# Supplementary material
Source: publisher site journal article supplement (https://www.spandidos-publications.com/8542/downloadSupplementary)
Supplement: Supplementary file 1 [file downloadSupplementary]

Table I. *In vitro* and *in vivo* anti-HCC effects of polysaccharides.

| First author/s, year      | Effective substance | Source                                        | Molecular mass, kDa          | <i>In vivo/in vitro</i> | Model                                     | Dose                             | Route of administration     | Mechanism of action                                                                                                                                                                  | Cells                        | (Ref.) |
|---------------------------|---------------------|-----------------------------------------------|------------------------------|-------------------------|-------------------------------------------|----------------------------------|-----------------------------|--------------------------------------------------------------------------------------------------------------------------------------------------------------------------------------|------------------------------|--------|
| Zhao <i>et al</i> , 2022  | Polysaccharides     | <i>Grifola frondosa</i>                       | 2,190                        | <i>In vitro</i>         | -                                         | 0.1, 0.4, 0.8, 1.2 and 1.6 mg/ml | -                           | Inhibits HepG2 cell proliferation via intrinsic activation of the mitochondrial pathway and the Fas/FasL-mediated caspase-8/-3 pathway.                                              | HepG2                        | (13)   |
| Yu <i>et al</i> , 2020    | Polysaccharides     | <i>Grifola frondosa</i>                       | 644.9                        | <i>In vitro</i>         | -                                         | 12.5-800 µg/ml                   | -                           | Induces G <sub>1</sub> /S phase cell cycle arrest, leading to suppression of proliferation and activation of apoptosis.                                                              | H22 and HepG2                | (14)   |
| Qiu <i>et al</i> , 2023   | Polysaccharide      | <i>Ulva lactuca</i>                           | -                            | <i>In vivo</i>          | Male ICR mice, xenograft model            | 100, 200 and 300 mg/kg           | Oral administration         | Inhibits tumor cell proliferation by modulating miR-98-5p-dependent ROS signaling.                                                                                                   | H22                          | (21)   |
| Li <i>et al</i> , 2022    | Polysaccharide      | <i>Polygonatum sibiricum</i>                  | 38.65                        | <i>In vitro</i>         | -                                         | 100, 200 and 400 µg/ml           | -                           | Triggers G <sub>1</sub> arrest and induces mitochondrial-dependent apoptosis via activation of caspase-9 and caspase-3 in tumor cells.                                               | HepG2                        | (22)   |
| Sang <i>et al</i> , 2023  | Polysaccharide      | <i>Hemerocallis citrina</i> Baroni            | -                            | -                       | -                                         | -                                | -                           | Causes G <sub>2</sub> /M cell cycle arrest and triggers the intrinsic mitochondrial apoptotic pathway, leading to inhibition of tumor cell proliferation and induction of apoptosis. | HL-7702                      | (23)   |
| Liu <i>et al</i> , 2022   | Polysaccharides     | <i>Bletilla striata</i> L.                    | 23                           | <i>In vivo</i>          | Male BALB/c mice, xenograft model         | 100 and 200 mg/kg/day            | Oral gavage                 | Induces G <sub>1</sub> phase cell cycle arrest and apoptosis.                                                                                                                        | H22                          | (24)   |
| Kong <i>et al</i> , 2024  | Polysaccharides     | <i>Brassica rapa</i> L.                       | 9.906-1,090.449              | <i>In vivo</i>          | Male BALB/c mice, xenograft model         | 400 mg/kg                        | Oral gavage                 | Induces apoptosis via activation of the caspase cascade.                                                                                                                             | H22                          | (25)   |
| Huang <i>et al</i> , 2016 | Polysaccharides     | <i>Astragalus membranaceus</i> (Fisch.) Bunge | 1.61x10 <sup>3</sup>         | <i>In vitro</i>         | -                                         | 0.1, 0.5 and 1 mg/ml             | -                           | Promotes apoptosis in human HCC cells by suppressing Notch1 expression.                                                                                                              | H22                          | (26)   |
| Wang <i>et al</i> , 2021  | α-d-Glucan          | <i>Holotrichia diomphalia</i> Bates           | 19                           | <i>In vivo</i>          | Male BALB/c mice, xenograft model         | 50 mg/kg/day                     | i.p. injection              | Inhibits aldolase activity and p-AMPKα expression, thereby suppressing tumor growth.                                                                                                 | H22                          | (27)   |
| Su <i>et al</i> , 2021    | Polysaccharide      | <i>Sipunculus nudus</i>                       | 9.22                         | <i>In vivo</i>          | Male athymic nu/nu mice, xenograft model  | 50, 100 and 200 mg/kg/day        | Intragastric administration | Triggers the intrinsic (mitochondria-mediated) apoptotic pathway, inhibits cellular proliferation and promotes apoptosis.                                                            | HepG2                        | (28)   |
| Tan <i>et al</i> , 2023   | Polysaccharide      | <i>Cordyceps sinensis</i>                     | 2.1x10 <sup>3</sup> and 21.9 | <i>In vivo</i>          | Male BALB/c mice, xenograft model         | 100 and 300 mg/kg/day            | Intragastric administration | Exerts antiproliferative and pro-apoptotic effects by modulating the IL-10/STAT3/Bcl-2 axis and activating the cytochrome <i>c</i> /caspase-8/-3 cascade.                            | H22                          | (29)   |
| Yue <i>et al</i> , 2025   | Fucoidan            | Brown algae ( <i>Saccharina japonica</i> )    | 112.8                        | <i>In vivo</i>          | Male ICR mice, xenograft model            | 100 mg/kg/day                    | Oral administration         | Markedly suppresses tumor angiogenesis and downregulates pro-inflammatory cytokines, including IL-1β, IL-6 and TNF-α.                                                                | H22                          | (30)   |
| Cho <i>et al</i> , 2016   | Fucoidan            | Brown algae ( <i>Saccharina japonica</i> )    | -                            | <i>In vivo</i>          | Male BALB/c mice, splenic injection model | 1 mg/ml                          | Oral administration         | Induction of ID-1 suppression inhibits the invasive potential of HCC cells <i>in vitro</i> and <i>in vivo</i> .                                                                      | Huh-7                        | (31)   |
| Cho <i>et al</i> , 2016   | Fucoidan            | Brown algae ( <i>Saccharina japonica</i> )    | -                            | <i>In vitro</i>         | -                                         | 0.1 mg/ml                        | -                           | NDRG-1/GAP43-dependent downregulation of ID-1 suppresses HCC invasion.                                                                                                               | Huh-7, SNU-761 and SNU-3085  | (31)   |
| Ren <i>et al</i> , 2018   | Polysaccharide      | <i>Angelica sinensis</i>                      | -                            | <i>In vivo</i>          | Male BALB/c mice, xenograft model         | 100 mg/kg/day                    | i.p. injection              | Suppresses hepatic expression of IL-6, JAK2, p-STAT3 and p-SMAD1/5/8, indicating the involvement of the JAK/STAT and BMP-SMAD pathways in ASP-mediated hepcidin regulation.          | HepG2 and H22                | (32)   |
| Feng <i>et al</i> , 2019  | Polysaccharide      | <i>Ocimum basilicum</i> L.                    | -                            | <i>In vivo</i>          | Male BALB/c mice, xenograft model         | 100, 200 and 400 mg/kg/day       | Oral gavage                 | Suppresses tumor metastasis by inhibiting HIF-1α-driven EMT.                                                                                                                         | MHCC9 7H and MHCC9 7L        | (33)   |
| Qiu <i>et al</i> , 2025   | Polysaccharide      | <i>Ulva lactuca</i>                           | -                            | <i>In vivo</i>          | Male ICR mice, xenograft model            | 100 mg/kg/day                    | i.p. injection              | Suppresses tumor cell proliferation by inhibiting miR-542-3p-mediated SLC35F6 expression.                                                                                            | H22 and HepG2                | (34)   |
| Li <i>et al</i> , 2025    | Polysaccharides     | <i>Antrodia cinnamomea</i>                    | -                            | <i>In vitro</i>         | -                                         | 133.9 µg/ml                      | -                           | Promotes autophagic cell death in a ROS/JNK-dependent manner.                                                                                                                        | HepG2, THLE-2, Huh-7 and H22 | (35)   |

|                             |                         |                                                        |                                             |                 |                                                           |                                        |                             |                                                                                                                                                                       |                          |      |
|-----------------------------|-------------------------|--------------------------------------------------------|---------------------------------------------|-----------------|-----------------------------------------------------------|----------------------------------------|-----------------------------|-----------------------------------------------------------------------------------------------------------------------------------------------------------------------|--------------------------|------|
| Cheng <i>et al</i> , 2021   | Polysaccharide          | <i>Asparagus officinalis</i> L.                        | -                                           | <i>In vivo</i>  | Male BALB/c mice, xenograft model                         | 25, 50 and 100 mg/kg/day               | Intragastric administration | Inhibits the MAPK/PI3K signaling cascade, suppresses HIF-1 $\alpha$ and VEGF expression, and impairs tumor cell migration and invasion.                               | SK-Hep1 and Hep-3B       | (36) |
| Cheng <i>et al</i> , 2019   | Polysaccharide          | <i>Asparagus</i>                                       | -                                           | <i>In vitro</i> | -                                                         | 2.5, 5 and 10 mg/ml                    | -                           | Exerts inhibitory effects on the HIF-1 $\alpha$ /VEGF axis by suppressing AKT, mTOR and ERK phosphorylation.                                                          | SK-Hep1 and Hep-3B       | (37) |
| You <i>et al</i> , 2023     | Polysaccharide          | <i>Lentinus edodes</i>                                 | -                                           | <i>In vivo</i>  | Male C57BL/6 mice, DEN-induced primary liver cancer model | 0.865, 1.73 and 3.46 mg/kg             | Oral gavage                 | Enhances PTEN levels and inhibits PI3K/AKT signaling, resulting in apoptosis activation.                                                                              | Hepa1-6                  | (38) |
| Li <i>et al</i> , 2024      | Polysaccharide          | <i>Codonopsis pilosula</i>                             | -                                           | <i>In vivo</i>  | Male BALB/c mice, xenograft model                         | 25, 50 and 100 mg/kg/day               | Oral gavage                 | Suppresses CDK1 activity, perturbs PDK1/ $\beta$ -catenin signaling, inhibits EMT, and consequently impairs tumor cell proliferation and metastasis.                  | Huh-7                    | (39) |
| Zhang <i>et al</i> , 2012   | Sulfated glycopeptide   | <i>Gekko swinhonis</i> Guenther                        | -                                           | <i>In vitro</i> | -                                                         | 10, 100 and 200 $\mu$ g/ml             | -                           | Blocks bFGF-mediated angiogenesis by preventing bFGF generation and extracellular release, and by competitively interfering with its binding to HSPGs.                | Bel-7402 and HepG2       | (40) |
| Zhang <i>et al</i> , 2012   | Sulfated glycopeptide   | <i>Gekko swinhonis</i> Guenther                        | -                                           | <i>In vivo</i>  | Male nu/nu nude and C57BL/6 mice, xenograft model         | 20 and 200 mg/kg/day                   | i.p. injection              | Inhibits bFGF-induced angiogenesis.                                                                                                                                   | Bel-7402 and HepG2       | (40) |
| Yang <i>et al</i> , 2022    | Polysaccharide          | <i>Pholiota adiposa</i>                                | 16.453                                      | -               | -                                                         | -                                      | -                           | Inhibits cell cycle progression at the G <sub>0</sub> /G <sub>1</sub> checkpoint, subsequently inducing apoptosis.                                                    | HepG2, Hep-3B and Huh7   | (41) |
| Wang <i>et al</i> , 2024    | Polysaccharides         | Vinegar-baked Radix Bupleuri                           | VRP3-3, 16.05; VRP2-3, 95.35; VRP2-4, 57.90 | <i>In vitro</i> | -                                                         | 3.13, 6.25, 12.5, 25 and 50 $\mu$ g/ml | -                           | Substantially improves hepatic drug accumulation by enhancing relative uptake and targeting efficiencies, resulting in superior hepatic tropism.                      | Huh 7, HepG2 and Bel7402 | (42) |
| Yang <i>et al</i> , 2019    | Polysaccharide          | <i>Trametes robiniophila</i> Murr                      | 55.9                                        | <i>In vitro</i> | -                                                         | 0.5 mg/ml                              | -                           | Supernatant from TPG-1-treated RAW264.7 cells exhibits time-dependent cytotoxicity against HepG2 cells, whereas supernatant from untreated cells does not.            | HepG2 and SK-HEP-1       | (43) |
| Yang <i>et al</i> , 2019    | Polysaccharide          | <i>Trametes robiniophila</i> Murr                      | 55.9                                        | <i>In vivo</i>  | Male BALB/c mice, xenograft model                         | 60 mg/kg/day                           | i.p. injection              | Inhibits HepG2 cell proliferation and promotes leukocyte infiltration into HepG2-derived tumors in nude mice.                                                         | HepG2 and H22            | (43) |
| Wang <i>et al</i> , 2016    | Polysaccharide          | <i>Acanthopanax senticosus</i> (Rupr. et Maxim.) Harms | 740, 38, 45 and 23                          | -               | -                                                         | -                                      | -                           | Blocks Wnt/ $\beta$ -catenin signaling, resulting in G <sub>0</sub> /G <sub>1</sub> phase cell cycle arrest, reduced proliferation and enhanced apoptotic cell death. | HepG2                    | (44) |
| Chen <i>et al</i> , 2019    | Polysaccharides         | <i>Grifola frondosa</i>                                | 1,231.7                                     | <i>In vitro</i> | -                                                         | 100, 200 and 400 $\mu$ g/ml            | -                           | Promotes apoptotic cell death by activating the mitochondrial pathway and the caspase-8/-3 cascade, while inhibiting cellular proliferation.                          | HepG2                    | (45) |
| Hu <i>et al</i> , 2020      | Polysaccharides         | <i>Dictyophora</i> Desv.                               | 8-14                                        | <i>In vitro</i> | -                                                         | 2.5 mg/ml                              | -                           | Promotes upregulation of Bax and cleaved caspase-3, arrests the cell cycle at the G <sub>2</sub> /M phase, and inhibits cellular proliferation.                       | LM3                      | (46) |
| Ying <i>et al</i> , 2024    | Polysaccharide          | <i>Poria cocos</i> (Schw.) Wolf                        | -                                           | <i>In vitro</i> | -                                                         | 800 mg/l                               | -                           | Targets SQLE to induce NLRP3/GSDMD-mediated pyroptosis and attenuate tumor cell migration.                                                                            | HepG2                    | (47) |
| Weiping <i>et al</i> , 2024 | Sulfated polysaccharide | <i>Undaria pinnatifida</i>                             | -                                           | <i>In vitro</i> | -                                                         | 400, 800 and 1,000 mg/ml               | -                           | Inhibits cancer cell proliferation and migration by suppressing EMT and MMP expression.                                                                               | HepG2 and SMMC-7721      | (48) |
| Cai <i>et al</i> , 2021     | Polysaccharide          | <i>Black fungus</i>                                    | -                                           | <i>In vitro</i> | -                                                         | 50 and 100 $\mu$ g/ml                  | -                           | Causes S-phase cell cycle arrest, exacerbates DNA damage, suppresses tumor cell proliferation, migration and invasion, and triggers apoptotic cell death.             | HepG2                    | (49) |

AMPK $\alpha$ , AMP-activated protein kinase  $\alpha$ ; ASP, *Angelica sinensis* polysaccharide; bFGF, Basic fibroblast growth factor; BMP, bone morphogenetic protein; GAP43, growth-associated protein 43; EMT, epithelial-mesenchymal transition; FasL, Fas ligand; GSDMD, Gasdermin D; HCC, hepatocellular carcinoma; HIF-1 $\alpha$ , hypoxia-inducible factor-1 $\alpha$ ; HSPG, heparan sulfate proteoglycan; ICR, Institute of Cancer Research; ID-1, inhibitor of DNA binding 1; i.p., intraperitoneal; JAK, Janus kinase; miR, microRNA; NDRG-1, N-Myc downstream regulated gene 1; NLRP3, NLR family pyrin domain containing 3; p-, phosphorylated; PDK1, pyruvate dehydrogenase kinase 1; ROS, reactive oxygen species; SLC35F6, solute carrier family 35 member F6; SQLE, squalene epoxidase; TPG-1, tumor-progression-related gene 1.
